# Supplementary material for: Uptake of per- and polyfluorinated alkyl substances by dry farmed oats following the agricultural application of biosolids and compost
Source: Royal Society of Chemistry journal article supplement (doi:10.1039/d4em00502c), 2025-01-01
Supplement: d4em00502c2.xlsx [file d4em00502c2.xlsx]

## Sheet: S6-Sample Concentrations
Table S6. Concentrations of Target PFAS Compounds in All Samples
Analyte	Abbrev	Class	LOD	LOQ	Site A Bio Loc1	Site A Bio Loc 2	Site A Bio Loc 3	Site A Soil PreA Loc1	Site A Soil PreA Loc2	Site A Soil PreA Loc3	Site A Oat Loc1	Site A Oat Loc2	Site A Oat Loc3	Site A Soil Hvst Loc1	Site A Soil Hvst Loc2	Site A Soil Hvst Loc3	Site B Bio Loc1	Site B Bio Loc2	Site B Bio Loc3	Site B Soil PreA Loc1	Site B Soil PreA Loc2	Site B Soil PreA Loc3	Site B Oat Loc1	Site B Oat Loc2	Site B Oat Loc3	Site B Soil Hvst Loc1	Site B Soil Hvst Loc2	Site B Soil Hvst Loc3	Organic Comp Loc1	Organic Soil PreA Loc1	Organic Soil PreA Loc2	Organic Soil PreA Loc3	Organic Oat Loc1	Organic Oat Loc2	Organic Oat Loc3	Organic Soil Hvst Loc1	Organic Soil Hvst Loc2	Organic Soil Hvst Loc3	Compost Oat Loc1	Compost Oat Loc2	Compost Oat Loc3	Compost Soil Hvst Loc1	Compost Soil Hvst Loc2	Compost Soil Hvst Loc3	Compost & Lime Soil Hvst Loc1	Compost & Lime Soil Hvst Loc2	Compost & Lime Soil Hvst Loc3	Compost & Lime Oat Loc1	Compost & Lime Oat Loc2
11-Chloroeicosafluoro-3-oxaundecane-1-sulfonate	11-Cl-PF3ONS	PFOS Replacement	1.24875	4.995
1H,1H,2H,2H-perfluorohexane sulfonate	4:2 FTS	PreFAS	1.24875	4.995
1H,1H,2H,2H-perfluoro-1-octanesulfonate	6:2 FTS	PreFAS	1.24875	4.995
1H,1H,2H,2H-Perfluorodecane sulfonate	8:2 FTS	PreFAS	2.4975	12.4875
9-Chlorohexadecafluoro-3-oxanonane-1-sulfonate	9-Cl-PF3ONS	PFOS Replacement	1.24875	4.995
N-Ethylperfluorooctanesulfonamidoacetic acid*	EtFOSAA	PreFAS	2.4975	12.4875				81.6394	11.4556	3.3897										6.5598
Perfluorooctane sulfonamide*	FOSA*	other	1.24875	4.995				1.7161												3.7609
Tetrafluoro(heptafluoropropoxy)propanoic acid	HFPO-DA	PFOS Replacement	12.4875	49.95
Dodecafluoro-3H-4,8-dioxanonanoate	NaDONA	PFOS Replacement	2.4975	12.4875
N-ethylperfluoro-1-octanesulfonamide*	N-EtFOSA-M*	PreFAS	2.4975	12.4875
2-(N-ethylperfluoro-1-octanesulfonamido)-ethanol*	N-EtFOSE-M*	PreFAS	12.4875	49.95
N-methylperflouro-1-octanesulfonamide*	N-MeFOSA-M*	PreFAS	1.24875	4.995
2-(N-methylperfluoro-1-octanesulfonamido)-ethanol	N-MeFOSE-M	PreFAS	12.4875	49.95
Perfluoro-n-butanoic acid*	PFBA*	PFCA	4.995	24.975
Perfluoro-n-decanoic acid	PFDA	PFCA	2.4975	12.4875				5.2802		5.8924				4.8388		5.0977	2.621			11.5859		5.7245				7.0677	3.136	12.2416
Perfluoro-n-dodecanoic acid*	PFDoA*	PFCA	2.4975	12.4875
Perfluoro-1-decanesulfonate	PFDS	PFSA	1.24875	4.995																18.0158						7.94157
Perfluoro-1-heptanesulfonate	PFHpS	PFSA	1.24875	4.995
Perfluoro-1-hexanesulfonate	PFHxS, Linear and Branched	PFSA	1.24875	4.995
Perfluoro-n-nonanoic acid	PFNA	PFCA	2.4975	12.4875
Perfluoro-1-nonanesulfonate	PFNS	PFSA	1.24875	4.995
Perfluoro-1-pentanesulfonate	PFPeS	PFSA	1.24875	4.995
Perfluoro-n-tetradecanoic acid*	PFTeDA*	PFCA	2.4975	12.4875
Perfluoro-n-tridecanoic acid*	PFTrDA*	PFCA	2.4975	12.4875
Perfluoro-n-undecanoic acid*	PFUnA*	PFCA	2.4975	12.4875
Perfluoro-n-hexanoic acid	PFHxA	PFCA	2.4975	12.4875	18.1463	47.7815																							6.7034
bis(1H,1H,2H,2H-perfluorooctyl)phosphate*	6:2 diPAP*	other	12.4875	49.95	18.782			39.1649
Perfluoro-n-octanoic acid	PFOA	PFCA	1.24875	4.995	12.4995	16.7484								1.4001						6.39772						1.6047		8.11361
N-Methylperfluorooctanesulfonamidoacetic acid*	MeFOSAA	PreFAS	4.995	24.975	9.299	7.3947		75.731	12.2404
Perfluoro-1-butanesulfonate	PFBS	PFSA	1.24875	4.995	1.857	14.4717
Perfluoro-1-octanesulfonate	PFOS	PFSA	1.24875	4.995	5.374	13.5094	2.668	37.8721	17.0572	44.5342				35.4809	20.067	37.4254	6.35504	6.45652	6.11562	41.9506	7.36788	11.4479				32.08	10.1168	20.2664	1.2607
Perfluoro-n-pentanoic acid	PFPeA	PFCA	2.4975	12.4875		2.988																							2.8896
Perfluoro-n-heptanoic acid	PFHpA	PFCA	1.24875	4.995		2.305
*Externally calibrated.
red text denotes value below quantifiable levels
green text denotes carryover
United States Environmental Protection Agency Office of Water, Biennial Review of 40 CFR part 503 To Fulfill Clean Water Act Section 405(d)(2)(C) Biosolids Biennial Report No.9 (Reporting Period 2020–2021), EPA-822R22007, December 2022
[truncated: 13 more columns]
